# Supplementary material for: Burden of pulmonary arterial hypertension in England: retrospective HES database analysis
Source: PubMed Central journal article supplement — Ther Adv Respir Dis. 2021 Feb 23;15:1753466621995040. doi: 10.1177/1753466621995040 (PMC7905485; doi:10.1177/1753466621995040), 2021-02-23

## Supplementary Material

Supplementary Table 1. Codes used to identify patient diagnoses, drugs, and healthcare resource utilisation.

| <b>Description</b>                                                                                               | <b>Code</b>           |
|------------------------------------------------------------------------------------------------------------------|-----------------------|
| <i>Inclusion diagnoses</i>                                                                                       | <i>ICD-10</i>         |
| Primary pulmonary hypertension                                                                                   | I27.0                 |
| Other secondary pulmonary hypertension                                                                           | I27.2                 |
| <i>Right heart catheterisation</i>                                                                               | <i>OPCS</i>           |
| Catheterisation of right side of heart NEC                                                                       | K65.2                 |
| Other specified catheterisation of heart                                                                         | K65.8                 |
| Unspecified catheterisation of heart                                                                             | K65.9                 |
| <i>Specialist referral centres for PAH in England</i>                                                            | <i>Trust code</i>     |
| Great Ormond Street Hospital for Children part of Great Ormond Street Hospital for Children NHS Foundation Trust | RP4                   |
| Hammersmith Hospital part of Imperial College Healthcare NHS Trust                                               | RYJ                   |
| Royal Brompton Hospital part of Royal Brompton and Harefield NHS Foundation Trust                                | RT3                   |
| Royal Free Hospital part of Royal Free London NHS Foundation Trust                                               | RAL                   |
| Papworth Hospital part of Papworth Hospital NHS Foundation Trust                                                 | RGM                   |
| Royal Hallamshire Hospital part of Sheffield Teaching Hospitals NHS Foundation Trust                             | RHQ                   |
| Freeman Hospital part of The Newcastle Upon Tyne Hospitals NHS Foundation Trust                                  | RTD                   |
| <i>Cardiology specialty</i>                                                                                      | <i>Specialty code</i> |
| Surgical specialties                                                                                             |                       |
| Cardiothoracic surgery                                                                                           | 170                   |
| Medical specialties                                                                                              |                       |
| Cardiology                                                                                                       | 320                   |
| Paediatric cardiology                                                                                            | 321                   |
| Respiratory medicine (also known as thoracic medicine)                                                           | 340                   |
| Rheumatology                                                                                                     | 410                   |
| <i>PAH-specific drugs</i>                                                                                        | <i>OPCS</i>           |
| Ambrisentan                                                                                                      | X82.1                 |
| Bosentan                                                                                                         | X82.2                 |
| Epoprostenol                                                                                                     | X82.4                 |
| Iloprost                                                                                                         | X82.3                 |
| Macitentan                                                                                                       | X82.1                 |
| Riociguat <sup>a</sup>                                                                                           | X82.1                 |
| Selexipag                                                                                                        | X82.1                 |
| Sildenafil <sup>a</sup>                                                                                          | X82.1                 |
| Tadalafil <sup>a</sup>                                                                                           | X82.1                 |
| Treprostinil sodium                                                                                              | X82.1                 |
| <i>Non-PAH forms of PH</i>                                                                                       | <i>ICD-10</i>         |
| WSPH Group 2: left heart disease                                                                                 |                       |
| Left ventricular failure                                                                                         | I50.1                 |
| Non-rheumatic mitral valve disorders                                                                             | I34                   |
| Non-rheumatic aortic valve disorders                                                                             | I35                   |
| Angina pectoris                                                                                                  | I20                   |
| STEMI and NSTEMI                                                                                                 | I21                   |
| Subsequent STEMI and NSTEMI                                                                                      | I22                   |
| Certain current complications following STEMI and NSTEMI (within 28-day period)                                  | I23                   |
| Other acute ischaemic heart diseases                                                                             | I24                   |
| Chronic ischaemic heart disease                                                                                  | I25                   |
| WSPH Group 3: lung disease and/or hypoxaemia                                                                     |                       |
| Bronchitis, not specified as acute or chronic                                                                    | J40                   |
| Simple and mucopurulent chronic bronchitis                                                                       | J41                   |
| Unspecified chronic bronchitis                                                                                   | J42                   |
| Emphysema                                                                                                        | J43                   |
| Other chronic obstructive pulmonary disease                                                                      | J44                   |
| Asthma                                                                                                           | J45                   |

| <b>Description</b>                                                        | <b>Code</b>   |
|---------------------------------------------------------------------------|---------------|
| Bronchiectasis                                                            | J47           |
| Other interstitial pulmonary diseases                                     | J84           |
| Sleep apnoea                                                              | G47.3         |
| Exposure to high and low air pressure and changes in air pressure         | W94           |
| WSPH Group 4: CTEPH                                                       |               |
| Pulmonary thromboembolism                                                 | I26           |
| <i>Congenital heart disease</i>                                           | <i>ICD-10</i> |
| Congenital malformations of cardiac chambers and connections              | Q20           |
| Congenital malformations of cardiac septa                                 | Q21           |
| Congenital malformations of pulmonary and tricuspid valves                | Q22           |
| Congenital malformations of aortic and mitral valves                      | Q23           |
| Other congenital malformations of heart                                   | Q24           |
| Congenital malformations of great arteries                                | Q25           |
| Congenital malformations of great veins                                   | Q26           |
| Other congenital malformations of peripheral vascular system              | Q27           |
| Other congenital malformations of circulatory system                      | Q28           |
| <i>Renal failure</i>                                                      | <i>ICD-10</i> |
| Acute kidney failure                                                      | N17           |
| CKD                                                                       | N18           |
| Unspecified kidney failure                                                | N19           |
| <i>Digital ulcers</i>                                                     |               |
| Non-pressure chronic ulcer of lower limb, not elsewhere classified        | L97           |
| Other disorders of skin and subcutaneous tissue, not elsewhere classified | L98           |
| <i>Erectile dysfunction</i>                                               | <i>ICD-10</i> |
| Failure of genital response                                               | F52.2         |
| Impotence of organic origin                                               | N48.4         |

CKD, chronic kidney disease; CTEPH, chronic thromboembolic pulmonary hypertension; ICD-10, International Classification of Diseases; Tenth Revision; NEC, not elsewhere classified; NHS, National Health Service; NSTEMI, non-ST-elevation myocardial infarction; OPCS, Office of Population Censuses and Surveys [defunct] Classification of Interventions and Procedures; PAH, pulmonary arterial hypertension; PH, pulmonary hypertension; STEMI, ST-elevation myocardial infarction; WSPH, World Symposium on Pulmonary Hypertension.

<sup>a</sup>Although these drugs have additional indications, it is assumed that when coded under X82.1–4 their use is specific to patients with PAH.

Supplementary Table 2. Proportion of patients in the overall PAH cohort with inpatient admissions, outpatient visits and A&amp;E attendances.

| <b>Percentage of patients with:</b> |                 | <b>2013 (n=1370)</b> | <b>2014 (n=1605)</b> | <b>2015 (n=1774)</b> | <b>2016 (n=1850)</b> | <b>2017 (n=1825)</b> |
|-------------------------------------|-----------------|----------------------|----------------------|----------------------|----------------------|----------------------|
| Inpatient admissions                | Total           | 83.6%                | 83.1%                | 82.0%                | 81.0%                | 79.9%                |
|                                     | PAH-related     | 72.1%                | 70.8%                | 72.7%                | 71.2%                | 71.8%                |
|                                     | Non-PAH-related | 33.8%                | 33.8%                | 31.2%                | 30.2%                | 28.4%                |
| Outpatient visits                   | Total           | 96.3%                | 96.0%                | 97.4%                | 97.0%                | 98.0%                |
| A&E attendance                      | Total           | 39.1%                | 32.2%                | 35.2%                | 41.0%                | 39.9%                |
|                                     | PAH-related     | 19.3%                | 19.0%                | 20.3%                | 20.9%                | 20.3%                |
|                                     | Non-PAH-related | 26.6%                | 29.3%                | 28.4%                | 29.0%                | 29.3%                |

A&E, Accident and Emergency; PAH, pulmonary arterial hypertension.

Supplementary Table 3. Inpatient, outpatient and A&amp;E hospital events in incident patients with PAH, by year following index date.

|                      |                 | <b>Year 1<br/>(n=1410)</b> |           | <b>Year 2<br/>(n=1045)</b> |           | <b>Year 3<br/>(n=765)</b> |           |
|----------------------|-----------------|----------------------------|-----------|----------------------------|-----------|---------------------------|-----------|
|                      |                 | <b>Mean</b>                | <b>SD</b> | <b>Mean</b>                | <b>SD</b> | <b>Mean</b>               | <b>SD</b> |
| Inpatient admissions | Total           | 4.4                        | 3.8       | 2.6                        | 3.9       | 2.3                       | 3.8       |
|                      | PAH-related     | 3.2                        | 2.8       | 1.8                        | 0.8       | 1.6                       | 2.1       |
|                      | Non-PAH-related | 1.2                        | 4.3       | 0.8                        | 5.1       | 0.7                       | 4.9       |
| Outpatient visits    | Total           | 10.9                       | 7.7       | 9.1                        | 7.5       | 8.2                       | 6.2       |
| A&E attendances      | Total           | 1.1                        | 1.1       | 0.8                        | 1.0       | 0.8                       | 0.9       |
|                      | PAH-related     | 0.6                        | 1.0       | 0.3                        | 0.9       | 0.3                       | 0.9       |
|                      | Non-PAH-related | 0.5                        | 1.1       | 0.5                        | 1.1       | 0.5                       | 1.0       |

A&E, Accident and Emergency; PAH, pulmonary arterial hypertension; SD, standard deviation.

Supplementary Table 4. Frequency distribution of inpatient admissions in the overall PAH cohort, by year.

| <b>Admissions, n (%)</b> | <b>2013<br/>(n=1143)</b> | <b>2014<br/>(n=1328)</b> | <b>2015<br/>(n=1448)</b> | <b>2016<br/>(n=1495)</b> | <b>2017<br/>(n=1454)</b> |
|--------------------------|--------------------------|--------------------------|--------------------------|--------------------------|--------------------------|
| 1                        | 278 (24%)                | 352 (27%)                | 369 (25%)                | 414 (28%)                | 429 (30%)                |
| 2                        | 244 (21%)                | 315 (24%)                | 339 (23%)                | 350 (23%)                | 342 (24%)                |
| 3                        | 209 (18%)                | 226 (17%)                | 226 (16%)                | 231 (15%)                | 228 (16%)                |
| 4                        | 126 (11%)                | 127 (10%)                | 154 (11%)                | 162 (11%)                | 155 (11%)                |
| 5                        | 88 (8%)                  | 99 (7%)                  | 99 (7%)                  | 104 (7%)                 | 116 (8%)                 |
| 6                        | 51 (4%)                  | 56 (4%)                  | 65 (4%)                  | 74 (5%)                  | 44 (3%)                  |
| 7                        | 34 (3%)                  | 43 (3%)                  | 42 (3%)                  | 40 (3%)                  | 29 (2%)                  |
| 8                        | 32 (3%)                  | 34 (3%)                  | 29 (2%)                  | 22 (1%)                  | 33 (2%)                  |
| 9                        | 12 (1%)                  | 19 (1%)                  | 23 (2%)                  | 16 (1%)                  | 10 (1%)                  |
| 10                       | 16 (1%)                  | 11 (1%)                  | 9 (1%)                   | 23 (2%)                  | 16 (1%)                  |
| 11–13                    | 22 (2%)                  | 13 (1%)                  | 20 (1%)                  | 24 (2%)                  | 23 (2%)                  |
| 14–16                    | 14 (1%)                  | 13 (1%)                  | 11 (1%)                  | 7 (0%)                   | 10 (1%)                  |
| ≥17                      | 17 (1%)                  | 31 (2%)                  | 22 (2%)                  | 28 (2%)                  | 19 (1%)                  |
| <b>Total</b>             | <b>1143 (100%)</b>       | <b>1328 (100%)</b>       | <b>1448 (100%)</b>       | <b>1495 (100%)</b>       | <b>1454 (100%)</b>       |

PAH, pulmonary arterial hypertension.

Supplementary Table 5. Length of hospital stays in incident patients with PAH, by year following index date.

| <b>Days per inpatient spell<sup>a</sup></b> | <b>Year 1 (n=1410)</b> |           | <b>Year 2 (n=1045)</b> |           | <b>Year 3 (n=765)</b> |           |
|---------------------------------------------|------------------------|-----------|------------------------|-----------|-----------------------|-----------|
|                                             | <b>Mean</b>            | <b>SD</b> | <b>Mean</b>            | <b>SD</b> | <b>Mean</b>           | <b>SD</b> |
| Total                                       | 4.6                    | 9.2       | 4.0                    | 8.5       | 3.6                   | 7.6       |
| PAH-related                                 | 5.3                    | 10.3      | 4.6                    | 9.5       | 4.1                   | 8.2       |
| Non-PAH-related                             | 2.4                    | 4.2       | 2.7                    | 5.1       | 2.4                   | 5.8       |

PAH, pulmonary arterial hypertension, SD, standard deviation.

<sup>a</sup>Defined as a continuous period spent as an inpatient, from admission until the earlier of discharge or study exit, plus any linked A&E attendance 24 hours prior to the inpatient admission.

Supplementary Table 6. Inpatient, outpatient and A&amp;E hospital events in the top 20% of all patients with PAH in terms of healthcare expenditure, by year, 2013–2017.

|                      |                 | 2013 (n=374) |     | 2014 (n=434) |     | 2015 (n=451) |      | 2016 (n=430) |      | 2017 (n=369) |      |
|----------------------|-----------------|--------------|-----|--------------|-----|--------------|------|--------------|------|--------------|------|
|                      |                 | Mean         | SD  | Mean         | SD  | Mean         | SD   | Mean         | SD   | Mean         | SD   |
| Inpatient admissions | Total           | 5.6          | 3.9 | 5.5          | 4.1 | 5.5          | 4.1  | 6.1          | 6.9  | 6.3          | 8.9  |
|                      | PAH-related     | 3.3          | 3.7 | 3.2          | 3.4 | 3.4          | 3.9  | 3.6          | 3.9  | 3.8          | 5.7  |
|                      | Non-PAH-related | 2.3          | 4.1 | 2.3          | 4.6 | 2.0          | 4.3  | 2.5          | 8.9  | 2.5          | 11.1 |
| Outpatient visits    | Total           | 13.9         | 9.9 | 14.2         | 9.7 | 15.0         | 10.1 | 15.9         | 10.5 | 14.8         | 10.3 |
| A&E attendances      | Total           | 1.4          | 2.0 | 1.5          | 2.0 | 1.6          | 2.4  | 1.7          | 2.0  | 1.6          | 1.6  |
|                      | PAH-related     | 0.6          | 1.2 | 0.6          | 1.2 | 0.6          | 1.2  | 0.7          | 1.2  | 0.8          | 1.7  |
|                      | Non-PAH-related | 0.8          | 2.6 | 0.9          | 2.5 | 1.0          | 3.1  | 1.0          | 2.6  | 0.9          | 1.6  |

A&E, Accident and Emergency; PAH, pulmonary arterial hypertension; SD, standard deviation.

Supplementary Figure 1. Top 20 most common comorbidities in patients with pulmonary arterial hypertension, 2013–2017: comparison of the top 20% of patients in terms of healthcare expenditure *versus* the overall cohort. *COPD* chronic obstructive pulmonary disease.

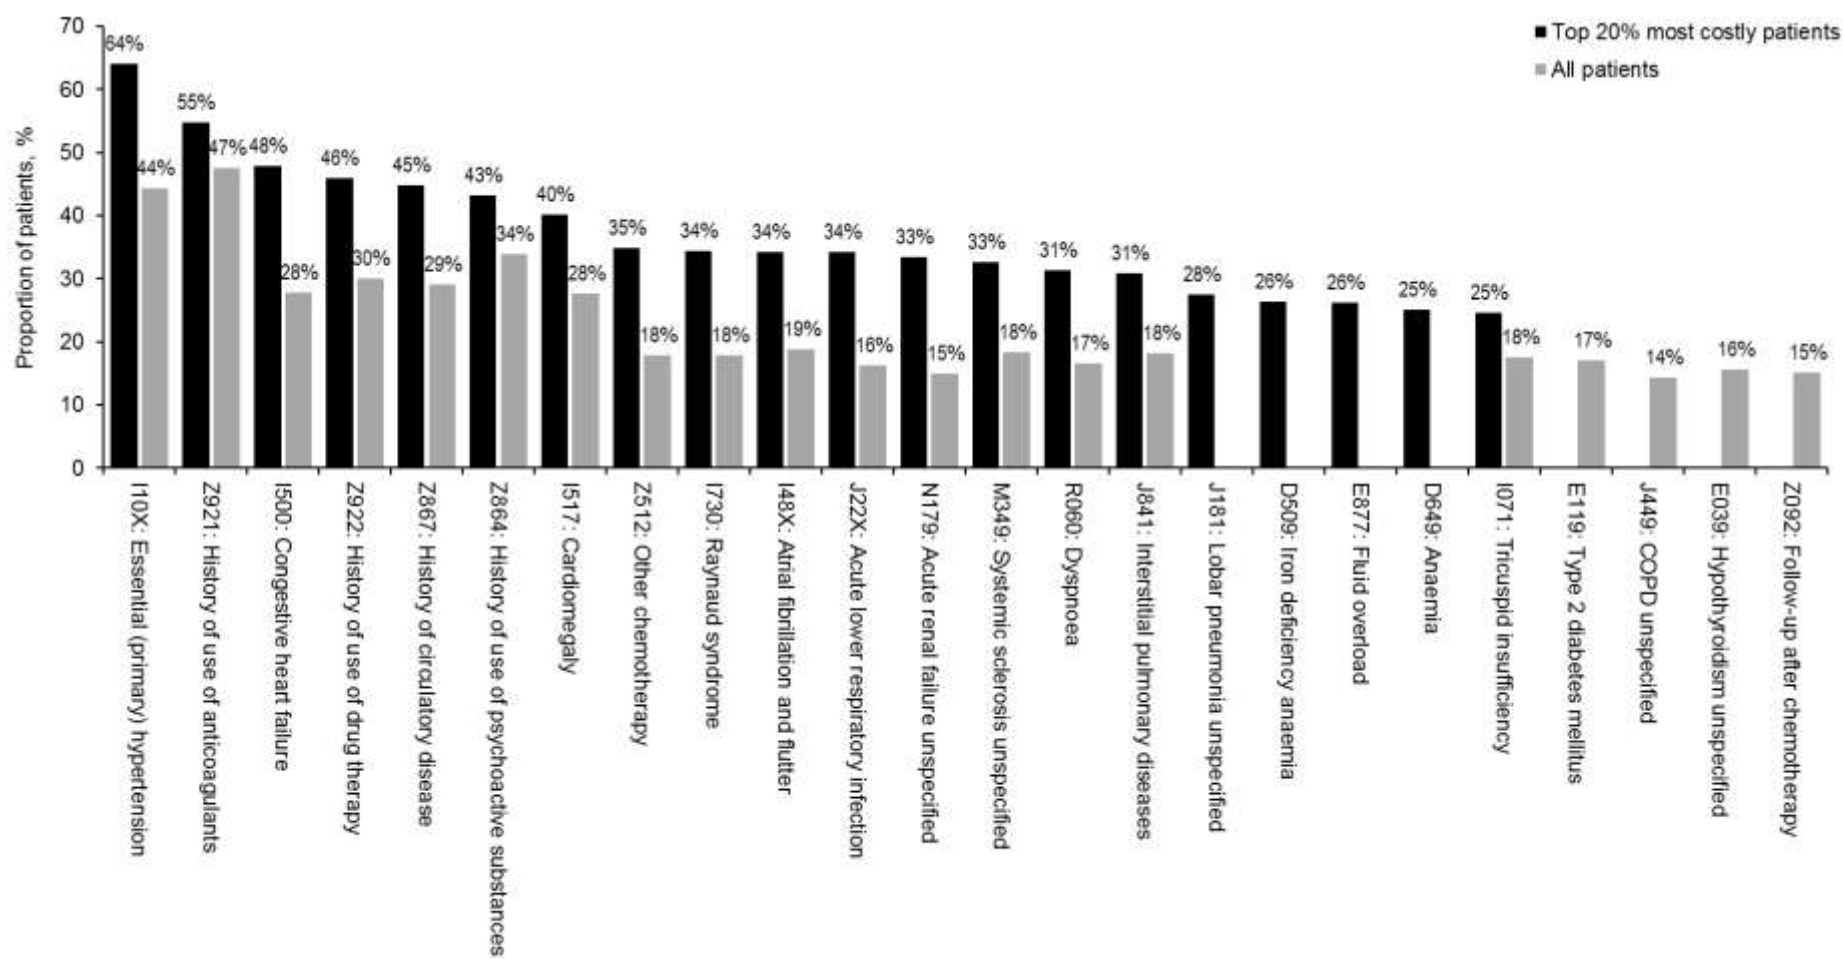

Supplementary Figure 2. Mean number of A) total, B) PAH-related, and C) non-PAH-related inpatient, outpatient and Accident and Emergency (A&E) hospital events in patients with pulmonary arterial hypertension, 2013–2017: comparison of the top 20% of patients in terms of healthcare expenditure *versus* the overall cohort.

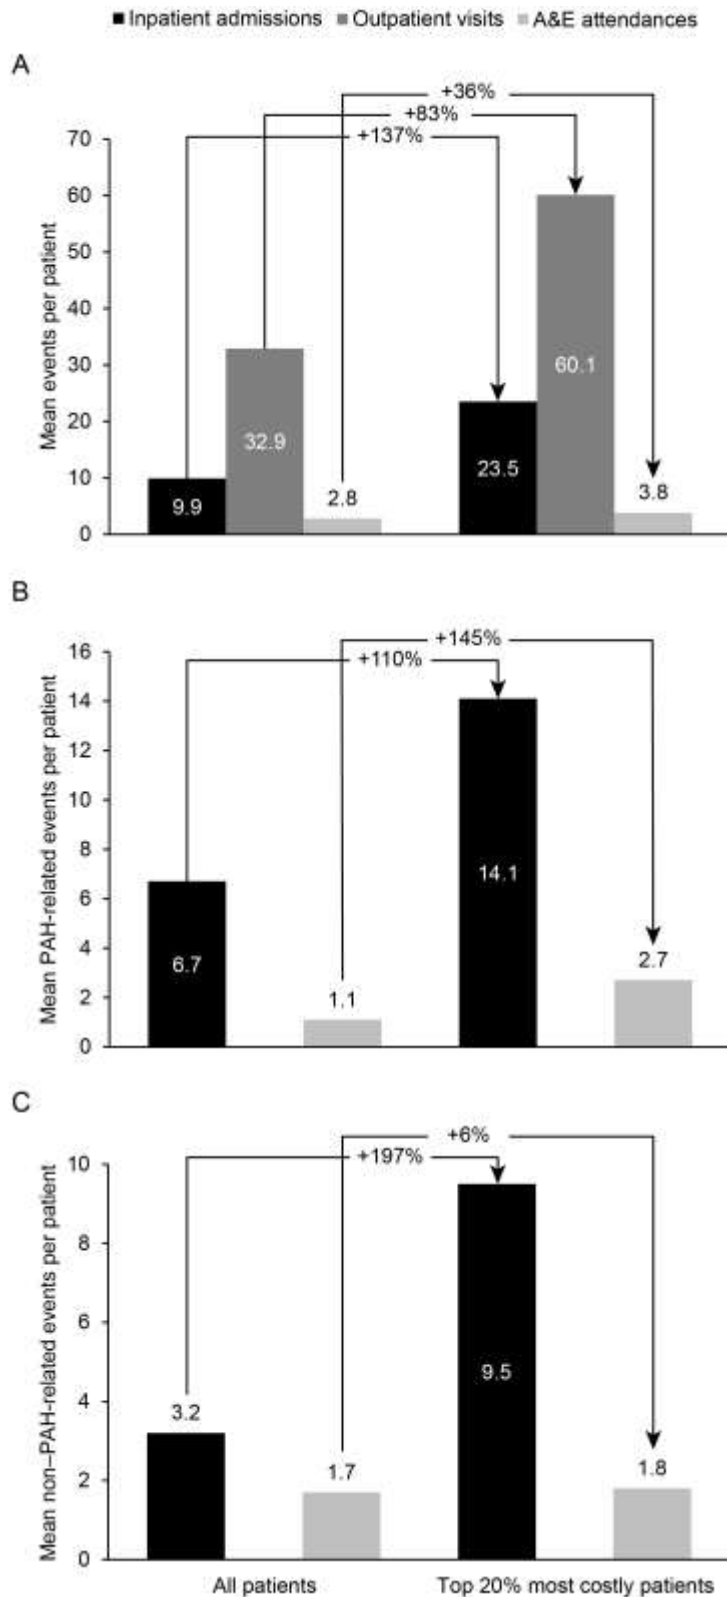



Supplementary Figure 3. Mean cost per event of A) total, B) PAH-related, and C) non-PAH-related inpatient, outpatient and Accident and Emergency (A&E) hospital events in patients with pulmonary arterial hypertension, 2013–2017: comparison of the top 20% of patients in terms of healthcare expenditure *versus* the overall cohort.

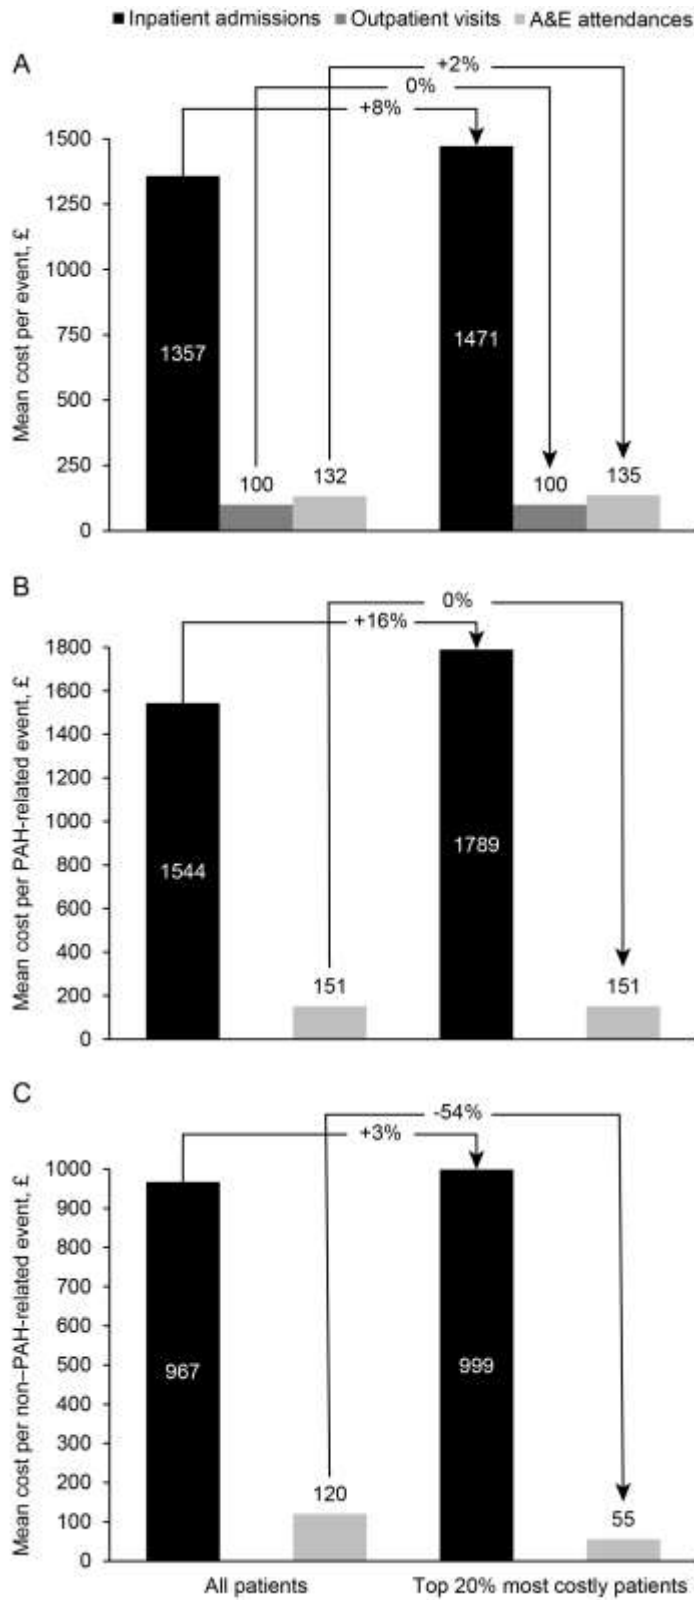

Supplement: sj-pdf-2-tar-10.1177_1753466621995040.pdf [file sj-pdf-2-tar-10.1177_1753466621995040.pdf]
